# Supplementary material
Source: PubMed Central journal article supplement (PMC10897819)
Supplement: jama-e241036-s002.pdf [file jama-e241036-s002.pdf]

## Data Sharing Statement

Andersson. Adverse Events After XBB.1.5-Containing COVID-19 mRNA Vaccines. *JAMA*.  
Published February 26, 2024. doi:10.1001/jama.2024.1036

### Data

**Data available:** No

### Additional Information

**Explanation for why data not available:** No additional data available. Owing to data privacy regulations in Denmark, the raw data cannot be shared. However, the data are available for research upon reasonable request to The Danish Health Data Authority and within the framework of the Danish data protection legislation and any required permission from Authorities.
